# Supplementary material for: Carotenoid Content and Bioaccessibility in Commercial Maize Hybrids
Source: MDPI journal article supplement (doi:10.3390/agriculture11070586), 2021-06-24
Supplement: s1 [file s1]

**Table S1.** Classification of tested hybrids into groups based on total carote-noid content in the grain.

| G1                 | G2                | G3                 | G4                     | G5                  |
|--------------------|-------------------|--------------------|------------------------|---------------------|
| <15 µg/g DM        | 15-20 µg/g DM     | 20-25 µg/g DM      | 25-30 µg/g DM          | >30 µg/g DM         |
| Bc Institut Bc 323 | Bc Institut Tesla | Bc Institut Agram  | Bc Institut Bc 418     | Bc Institut Bc 415  |
| NS seme 3022       | DKC 4670          | Bc Institut Alibi  | Bc Institut Bc 424     | Bc Institut Bc 572  |
| NS seme 4051       | DKC 4943          | Bc Institut Bc 344 | Bc Institut Bc 525     | Bc Institut Majstor |
| NS seme 6012       | DKC 5830          | Bc Institut Kekec  | Bc Institut Instruktor | Bc Institut Pajdaš  |
| PIO Os 4015        | KWS Kashmir       | DKC 4920           | Bc Institut Thriler    | KWS Kolumbaris      |
|                    | KWA Smaragd       | DKC 5068           | DKC 5031               |                     |
|                    | LG 30.3115        | DKC 5075           | DKC 5182               |                     |
|                    | LG 31.322         | DKC 5093           | KWS Konfites           |                     |
|                    | LG 31.545         | DKC 5685           | KWS KxB 8386           |                     |
|                    | NS seme 4051      | KWS Kapitolis      | LG 368/08              |                     |
|                    | PIO Os 3150       | KWS Kollegas       | MAS 34B                |                     |
|                    | PIO Os 3450       | KWS KxB 8453       | MAS 48L                |                     |
|                    | PIO Os 4014       | KWS Orlando        | PIO Os 3114            |                     |
|                    | PIO Os 522        | LG 30.315          | PIO Os 378             |                     |
|                    | PIO Tomasov       | LG 31.377          | Pioneer P9889          |                     |
|                    | Pioneer P0164     | LG Shannon         | Pioneer P9978          |                     |
|                    | Pioneer P0217     | MAS 56A            |                        |                     |
|                    | Pioneer P9241     | NS seme Haris      |                        |                     |
|                    | Pioneer P9300     | PIO Jablan         |                        |                     |
|                    | Pioneer P9363     | PIO Os 3850        |                        |                     |
|                    | Pioneer P9415     | PIO Os 398         |                        |                     |
|                    | Pioneer P9757     | PIO Posavac 36     |                        |                     |
|                    | RWA ES Inventive  | PIO Velimir        |                        |                     |
|                    | RWA Glumanda      | Pioneer P0200      |                        |                     |
|                    | RWA Hexagon       | Pioneer P0216      |                        |                     |
|                    | RWA Ulyxxe        | Pioneer P0412      |                        |                     |
|                    | RWA Persic        | Pioneer P0725      |                        |                     |
|                    | RWA Tweetor       | Pioneer P9903      |                        |                     |
|                    | Syngenta Sy Senko | Pioneer P9911      |                        |                     |
|                    |                   | RWA Ajowan         |                        |                     |
|                    |                   | RWA Gladiator      |                        |                     |
|                    |                   | RWA Inclusiv       |                        |                     |
|                    |                   | RWA Urbanix        |                        |                     |

Syngenta Sy Atomic

Syngenta Sy Bilbao

Syngenta Sy Carioca

Syngenta Sy Chorintos

Syngenta Sy Kreon

Syngenta Sy Lucius

Syngenta Sy Photon

Syngenta Sy Premeo

Syngenta Sy Sandoro

---
